# Supplementary material for: Emphysema distribution and annual changes in pulmonary function in male patients with chronic obstructive pulmonary disease
Source: PubMed Central journal article supplement (PMC3478996; doi:10.1186/1465-9921-13-31), 2012-04-18
Supplement: 1465-9921-13-31-S1.pdf [file 1465-9921-13-31-S1.pdf]

**Supplementary Table E1.** Follow-up spirometry and follow-up period (n = 131).

| Follow-up spirometric measurements | N (%)   |
|------------------------------------|---------|
| 1 - 2                              | 9 (7)   |
| 3 - 4                              | 28 (21) |
| 5 - 6                              | 55 (42) |
| 6 - 7                              | 38 (29) |
| 8 - 9                              | 1 (1)   |

---

| Follow-up period (y) | N (%)   |
|----------------------|---------|
| < 2                  | 14 (11) |
| 2 - 3                | 9 (7)   |
| 3 - 4                | 50 (38) |
| 4 - 5                | 51 (39) |
| ≥ 5                  | 7 (5)   |

**Supplementary Table E2.** Regular COPD medication during follow-up (n = 131).

| Medication                                                                                                                                              | N (%)    |
|---------------------------------------------------------------------------------------------------------------------------------------------------------|----------|
| Tiotropium                                                                                                                                              | 71 (54)  |
| Salmeterol/fluticasone combination                                                                                                                      | 23 (18)  |
| Inhaled corticosteroid                                                                                                                                  | 47 (36)  |
| Long-acting $\beta$ agonist                                                                                                                             | 32 (24)  |
| Any COPD regular medications<br>(including, tiotropium, salmeterol/fluticasone combination,<br>inhaled corticosteroid, and long-acting $\beta$ agonist) | 94 (72%) |

**Supplementary Table E3.** Clinical course of study patients (n =131).

|                                         | N (%)    |
|-----------------------------------------|----------|
| Ongoing follow-up                       | 106 (81) |
| Discontinuation of follow-up spirometry | 15 (11)  |
| Loss to follow-up                       | 8        |
| Severe respiratory failure              | 5        |
| Stroke                                  | 1        |
| Congestive heart failure                | 1        |
| Death                                   | 10 (8)   |
| Respiratory disease                     | 8        |
| Heart disease                           | 2        |

Status of patients ascertained at July 2011.
